# Supplementary material
Source: PubMed Central journal article supplement (PMC3809792)
Supplement: JCI69766sd.pdf [file JCI69766sd.pdf]

## SUPPLEMENTARY METHODS

### Novel kinase fusion oncogenes in post-Chernobyl radiation-induced pediatric thyroid cancers

Julio C. Ricarte-Filho<sup>1#</sup>, Sheng Li<sup>2,3#</sup>, Maria E. R. Garcia-Rendueles<sup>1</sup>, Cristina Montero-Conde<sup>1</sup>, Francesca Voza<sup>1</sup>, Jeffrey A. Knauf<sup>1,4</sup>, Adriana Heguy<sup>1</sup>, Agnes Viale<sup>5</sup>, Tetyana Bogdanova<sup>6</sup>, Geraldine A Thomas<sup>7</sup>, Christopher E. Mason<sup>2,3\*</sup>, James A. Fagin<sup>1,4\*</sup>

<sup>1</sup>Human Oncology and Pathogenesis Program, Memorial Sloan-Kettering Cancer Center, New York, NY 10065

<sup>2</sup>Dept. of Physiology and Biophysics, Weill Cornell Medical College, New York, NY 10065 USA

<sup>3</sup>The HRH Prince Alwaleed Bin Talal Bin Abdulaziz Alsaud Institute for Computational Biomedicine, Weill Cornell Medical College, New York, NY 10065 USA

<sup>4</sup>Department of Medicine, Memorial Sloan-Kettering Cancer Center, New York, NY 10065

<sup>5</sup>Genomics Core, Memorial Sloan-Kettering Cancer Center, New York, NY 10065

<sup>6</sup>Institute of Endocrinology and Metabolism, Kiev, Ukraine

<sup>7</sup>Department of Surgery and Cancer, Imperial College, Charing Cross Hospital, London, UK

## **Bioinformatic analysis of RNA sequencing data**

*Fusion detection:* We trimmed the first 13 bases and last 13 bases of the paired-end RNA sequencing reads to 50 bases as recommended by Snowshoes (1). We then mapped the trimmed reads to the hg19 using BWA (version 0.5.9-r16)(2). We used Snowshoes v2.0 to detect fusion events. False positive filtering followed the Snowshoes user manual. Specifically, the minimum distance between two genes for fusion candidates is 5 kb; the minimal number of read pairs that supports each fusion gene candidate is 10; the maximum number of fusion isoforms between two fusion partners is 20. We found 210 fusions in total across all 12 samples. After filtering out those fusions that were less than 5kb apart on the same chromosome, we were left with 96 genes. Of these, 16 were somatic fusion genes/isoforms, which were found in tumor tissues but not in matched normal. We also looked for supporting evidence for reciprocal fusions (fusions in opposite directions) with at least 3 unique junction reads required to support the fusion call.

*Detection of variants:* The first 2 and last 3 bases of each read in the paired-end RNA sequencing fastQ file were trimmed to remove low quality and high error base calls using fastx toolkit ([http://hannonlab.cshl.edu/fastx\\_toolkit/](http://hannonlab.cshl.edu/fastx_toolkit/)). Sequences were then aligned using Tophat (version 1.4.1) (3) and duplicates were removed (i.e. clonal reads with the same start and end reads after mapping) using Picard version 1.76 (<http://picard.sourceforge.net/>). We then used the Samtools (version 0.1.18)(4) mpileup command to pileup reads. We called somatic SNVs and INDELS using VarScan 2 (5;6). The thresholds for somatic variant calls are: they should be observed on reads from both strands, with a minimum tumor variant allele frequency of 20% and a maximum normal variant allele frequency of 5%. The p-value threshold for calling variants was 0.05. The base quality threshold is 15 and the mapping quality threshold is 15. The minimum coverage was 8 on tumor and 6 on normal. Also, if 3 SNVs were observed within a 10 bps window, or if the SNVs were near INDELS, they were removed. We further annotated the variants and predicted their effect on amino acid changes using snpEff<sup>10</sup>. In the current study, we only focused on the variants with a high/moderate effect based on snpEff impact classifications, including non-synonymous, frame shift, start lost, stop lost, and stop gained variants<sup>10</sup>. The final list of SNVs/INDELS with high/moderate effect is listed in Supplementary Tables 5.

*Gene expression:* We aligned paired-end RNA sequencing reads to the hg19 genome using Tophat and hg19 refseq annotation. We then calculated gene expression using rmake (<http://physiology.med.cornell.edu/faculty/mason/lab/r-make/>) for read count value. The gene

expression value is normalized by edgeR<sup>11-13</sup> calcNormFactors function using Trimmed Mean of M component (TMM) Normalization<sup>14</sup>. It normalized the compositional difference between the libraries. We also applied cpm function in edgeR<sup>11-13</sup> to calculate the counts per million (CPM) gene expression value. In the calculation of CPM, the raw read counts were divided by library size (which was normalized by TMM<sup>14</sup>) and multiplying by one million.

*Sample clustering:* To cluster the samples by gene expression, we use log 2 fold-change of CPM adjusted by 0.01. The hierarchical clustering method is "ward" and the distance method is "euclidean". Analysis and clustering were performed in the R statistical and programming environment (<http://www.r-project.org/>). Gene set for MAPK and PPARG pathways were obtained from (7) and (8), respectively.

### **Bioinformatics of WGS**

*Sequence alignment:* Paired-end reads from the whole genome sequencing were aligned to the hg19 human genome using Burrows-Wheeler Aligner (BWA) (version 0.7.5)<sup>2</sup>. PCR duplicates were removed using picard version 1.76 (<http://picard.sourceforge.net>). Alignments were further refined by The Genome Analysis Toolkit (GATK) pipeline (version 2.5-2) for local indel realignment and base quality recalibration (9;10). The mean  $\pm$  standard deviation of the genome coverage was  $7.22 \pm 0.60$ .

*Somatic SNVs and Indels:* We identified somatic mutations using Varscan (version 2.3.2). We used eight quality thresholds for somatic variant calls, including: (1) variant observed on reads from both strands, (2) a minimum tumor variant allele frequency of 20% and (3) a maximum normal variant allele frequency of 5%, (4) a p-value threshold for calling variants of 0.05, (5) base quality threshold of 15, (6) a mapping quality threshold of 15, (7) minimum coverage of 6 on tumor and normal samples and (8) if 3 SNVs were observed within a 10 bps window, or if the SNVs were near INDELS, they were removed. We further annotated the variants and predicted their effect on amino acid changes using snpEff<sup>10</sup>. Mann-Whitney-Wilcoxon test was used to compare the number of SNVs between the radiation-exposed and the sporadic groups. Known somatic SNVs in patient samples T35 and T38 were not directly called by Varscan due to low coverage at the mutation locus, but we found read pairs (T35: 3; T38: 1) supporting the alternative allele in tumor but not matched normal samples.

*Somatic chromosomal rearrangements:* We identified somatic chromosomal rearrangement using BreakDancer (version 1.1.2) (11). The minimum number of read pairs required was 2. Only inter-

chromosomal rearrangement or intra-chromosomal rearrangements with distances greater than 50 kb were taken for further analysis. Structural variations were annotated using Refseq annotation ([www.ncbi.nlm.nih.gov/refseq/](http://www.ncbi.nlm.nih.gov/refseq/)) and any rearrangements coming from the same gene or from the similar gene symbols were removed. Mann-Whitney-Wilcoxon test was used to compare the number of rearrangements between the two groups. Known chromosomal rearrangement in patient T5 and T27 were not directly called by BreakDancer due to low coverage at the breakpoint, but we found read pairs (T5: 1; T27: 13) spanning the known fusion partners in tumor samples but not matched normal.

#### Reference List

1. Asmann,Y.W., Hossain,A., Necela,B.M., Middha,S., Kalari,K.R., Sun,Z., Chai,H.S., Williamson,D.W., Radisky,D., Schroth,G.P. et al 2011. A novel bioinformatics pipeline for identification and characterization of fusion transcripts in breast cancer and normal cell lines. *Nucleic Acids Res.* **39**:e100.
2. Li,H., and Durbin,R. 2010. Fast and accurate long-read alignment with Burrows-Wheeler transform. *Bioinformatics.* **26**:589-595.
3. Kim,D., and Salzberg,S.L. 2011. TopHat-Fusion: an algorithm for discovery of novel fusion transcripts. *Genome Biol.* **12**:R72.
4. Li,H., Handsaker,B., Wysoker,A., Fennell,T., Ruan,J., Homer,N., Marth,G., Abecasis,G., and Durbin,R. 2009. The Sequence Alignment/Map format and SAMtools. *Bioinformatics.* **25**:2078-2079.
5. Koboldt,D.C., Zhang,Q., Larson,D.E., Shen,D., McLellan,M.D., Lin,L., Miller,C.A., Mardis,E.R., Ding,L., and Wilson,R.K. 2012. VarScan 2: somatic mutation and copy number alteration discovery in cancer by exome sequencing. *Genome Res.* **22**:568-576.
6. Koboldt,D.C., Chen,K., Wylie,T., Larson,D.E., McLellan,M.D., Mardis,E.R., Weinstock,G.M., Wilson,R.K., and Ding,L. 2009. VarScan: variant detection in massively parallel sequencing of individual and pooled samples. *Bioinformatics.* **25**:2283-2285.
7. Pratilas,C.A., Taylor,B.S., Ye,Q., Viale,A., Sander,C., Solit,D.B., and Rosen,N. 2009. (V600E)BRAF is associated with disabled feedback inhibition of RAF-MEK signaling and elevated transcriptional output of the pathway. *Proc. Natl. Acad. Sci. U. S. A.* **106**:4519-4524.

8. Giordano,T.J., Au,A.Y., Kuick,R., Thomas,D.G., Rhodes,D.R., Wilhelm,K.G., Jr., Vinco,M., Misek,D.E., Sanders,D., Zhu,Z. et al 2006. Delineation, functional validation, and bioinformatic evaluation of gene expression in thyroid follicular carcinomas with the PAX8-PPARG translocation. *Clin. Cancer Res.* **12**:1983-1993.
9. DePristo,M.A., Banks,E., Poplin,R., Garimella,K.V., Maguire,J.R., Hartl,C., Philippakis,A.A., del,A.G., Rivas,M.A., Hanna,M. et al 2011. A framework for variation discovery and genotyping using next-generation DNA sequencing data. *Nat. Genet.* **43**:491-498.
10. McKenna,A., Hanna,M., Banks,E., Sivachenko,A., Cibulskis,K., Kernytsky,A., Garimella,K., Altshuler,D., Gabriel,S., Daly,M. et al 2010. The Genome Analysis Toolkit: a MapReduce framework for analyzing next-generation DNA sequencing data. *Genome Res.* **20**:1297-1303.
11. Chen,K., Wallis,J.W., McLellan,M.D., Larson,D.E., Kalicki,J.M., Pohl,C.S., McGrath,S.D., Wendl,M.C., Zhang,Q., Locke,D.P. et al 2009. BreakDancer: an algorithm for high-resolution mapping of genomic structural variation. *Nat. Methods.* **6**:677-681.

## SUPPLEMENTAL DATA

### Novel kinase fusion oncogenes in post-Chernobyl radiation-induced pediatric thyroid cancers

Julio C. Ricarte-Filho<sup>1#</sup>, Sheng Li<sup>2,3#</sup>, Maria E. R. Garcia-Rendueles<sup>1</sup>, Cristina Montero-Conde<sup>1</sup>, Francesca Voza<sup>1</sup>, Jeffrey A. Knauf<sup>1,4</sup>,  
Adriana Heguy<sup>1</sup>, Agnes Viale<sup>5</sup>, Tetyana Bogdanova<sup>6</sup>, Geraldine A. Thomas<sup>7</sup>, Christopher E. Mason<sup>2,3\*</sup>, James A. Fagin<sup>1,4\*</sup>

<sup>1</sup>Human Oncology and Pathogenesis Program, Memorial Sloan-Kettering Cancer Center (MSKCC), New York, NY 10065 USA.

<sup>2</sup>Dept. of Physiology and Biophysics, Weill Cornell Medical College (WCMC), New York, NY 10065 USA.

<sup>3</sup>The HRH Prince Alwaleed Bin Talal Bin Abdulaziz Al Saud Institute for Computational Biomedicine, WCMC, New York, NY 10065 USA.

<sup>4</sup>Department of Medicine, MSKCC, New York, NY 10065 USA.

<sup>5</sup>Genomics Core, MSKCC, New York, NY 10065 USA.

<sup>6</sup>Institute of Endocrinology and Metabolism, Kiev, Ukraine.

<sup>7</sup>Department of Surgery and Cancer, Imperial College, Charing Cross Hospital, London, UK.

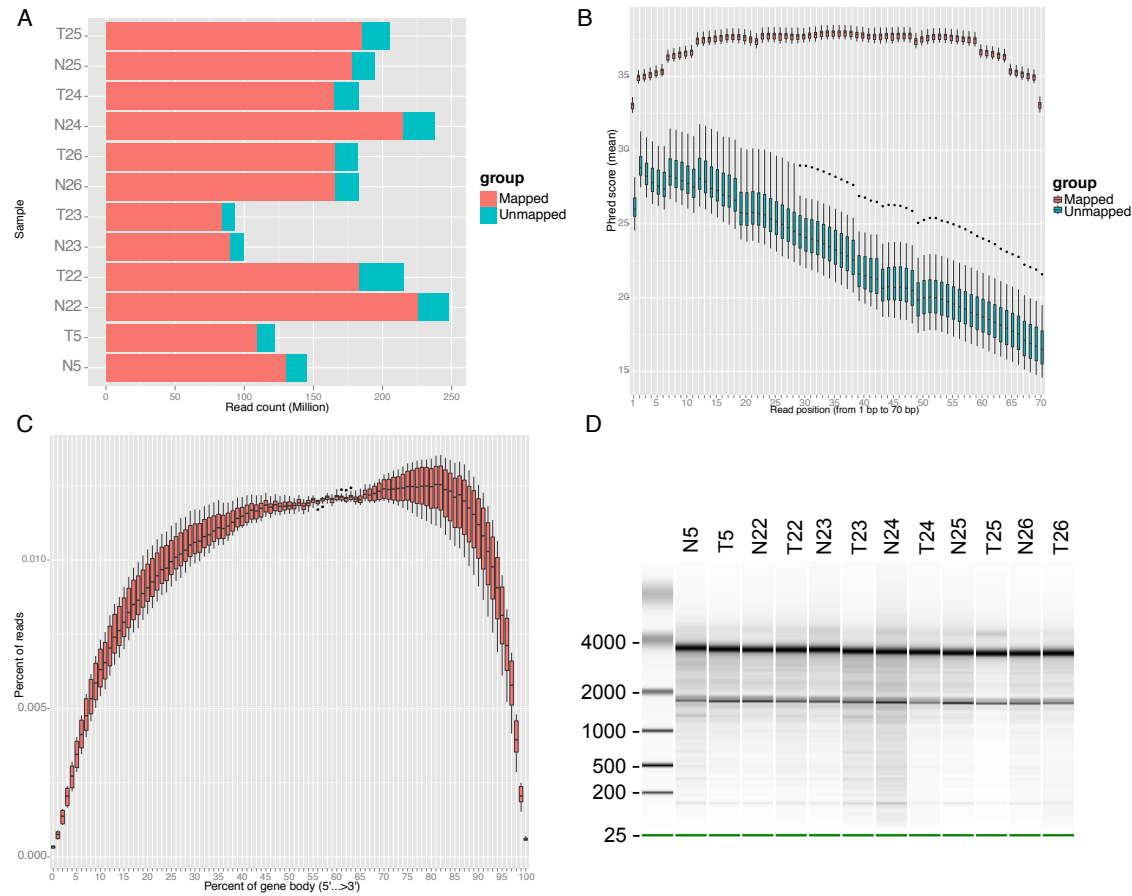

**Supplementary Figure 1: RNAseq data quality control.** **A.** Mapped and unmapped read count of all 12 RNAseq samples. **B.** Average phred quality score of mapped (red) and unmapped read (blue) for each base across all reads in 12 samples. Boxplot indicate the variance among samples. **C.** Gene body coverage over each percentage of all Refseq genes across all 12 RNAseq samples. Boxplot indicate the variance among samples. **D.** Bioanalyzer trace plot for RNA quality. The gene body coverage (C) indicates that there is a slight 3' enrichment for gene body coverage, which is consistent with the total RNA profile shown in the Bioanalyzer trace (D).

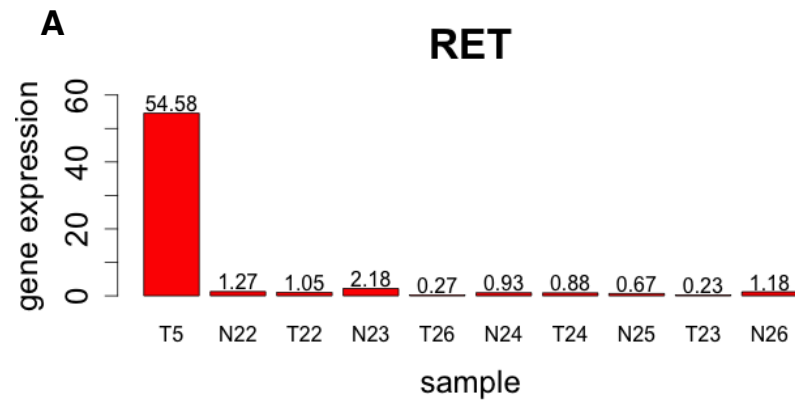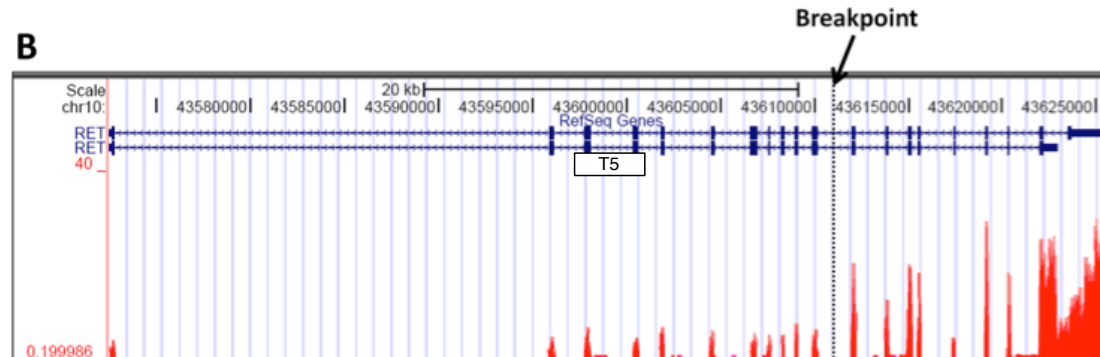

**Supplementary Figure 2: RET gene expression in RNA Seq data of RET/PTC3 mutant thyroid cancer. A.** Gene expression analysis confirmed *RET* mRNA to be exclusively enriched in the RET/PTC3 positive control sample. **B.** UCSC Genome Browser highlighting *RET* gene locus for sample T5. The breakpoint region between exons 11 and 12 of *RET* is shown. Increased FPKM values are seen in the 3' end of the gene (exons 12-20), which codes for the kinase domain of RET.



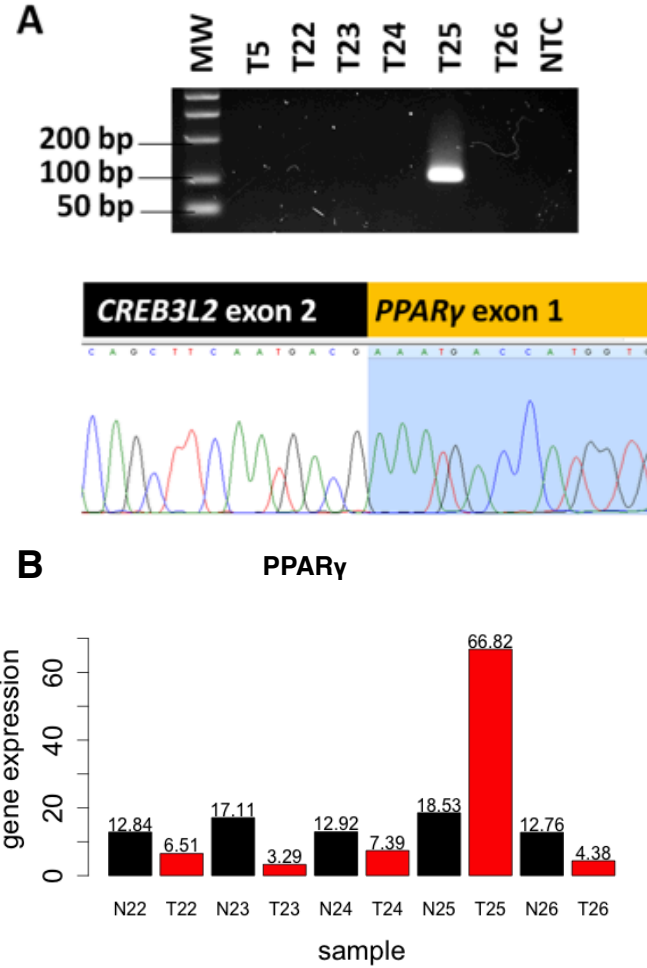

**Supplementary Figure 3: Identification and validation of CREB3L2/PPARG in a radiation-induced PTC. A.** Identification of CREB3L2/PPARG fusion by RT-PCR and confirmation by Sanger sequencing. **B.** *PPARG* expression (in CPM units) is increased exclusively in the tumor sample harboring the fusion.

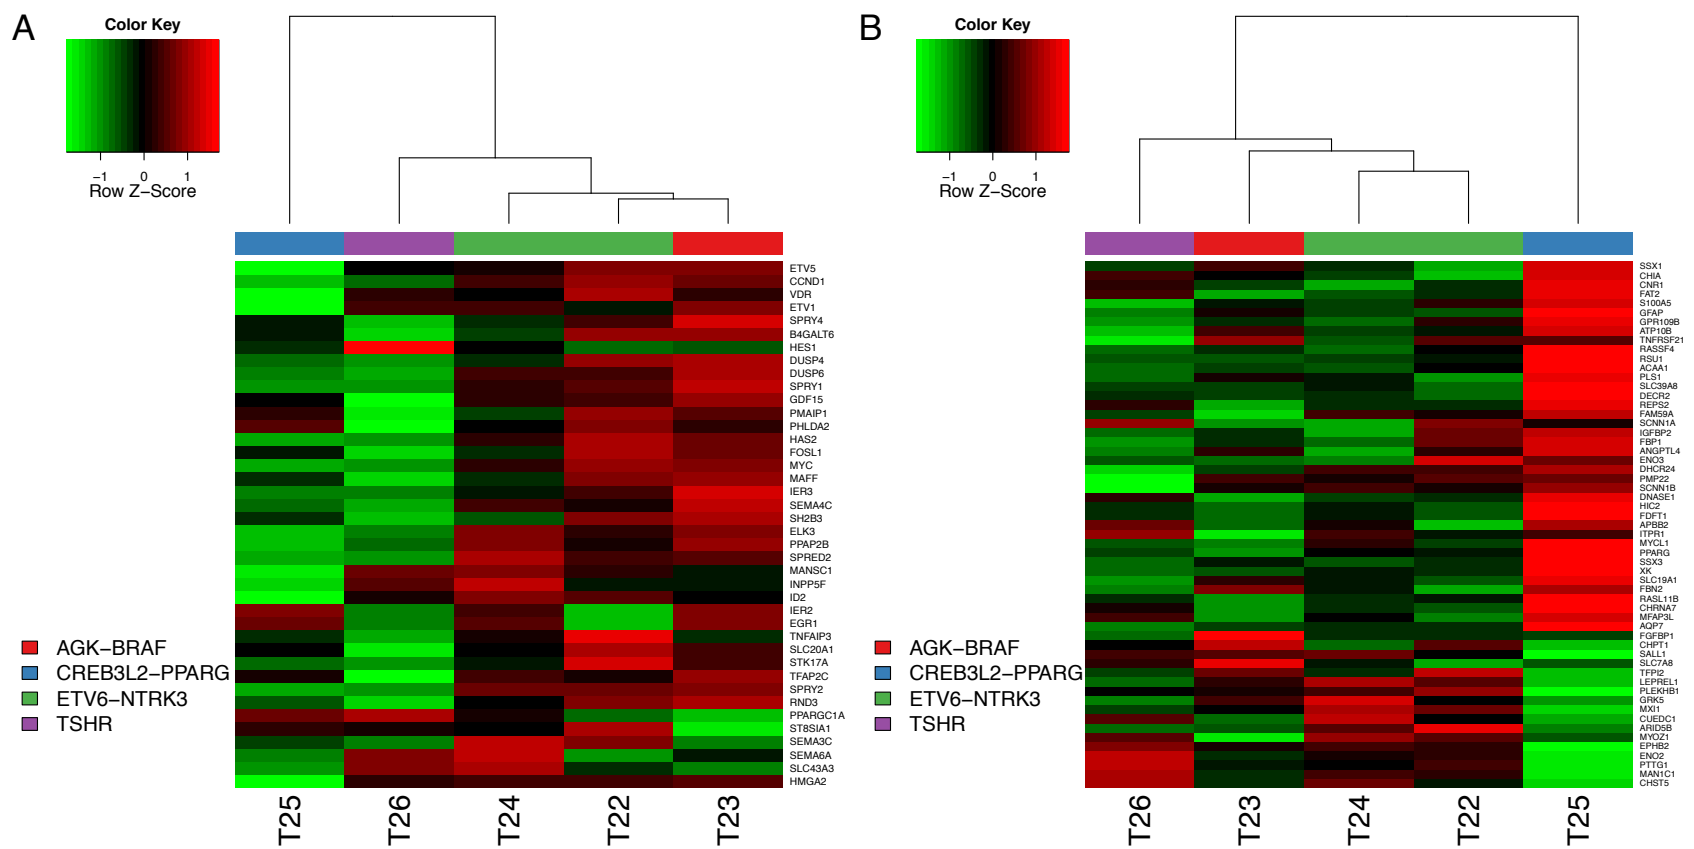

**Supplementary Figure 4: Heatmaps of gene expression log 2-fold change of tumor over normal in the 5 patient samples. A.** Heatmap of MAPK regulated genes. Gene list was based on transcripts showing significant changes in expression in BRAF-mutant cell lines treated with or without MEK inhibitor<sup>1</sup>. **B.** Heatmap of PPARG-regulated genes, based on list derived from thyroid cancers harboring PAX8-PPARG fusions<sup>2</sup>. Z-score was calculated using log 2-fold change of CPM between tumors and normal and adjusted by 0.01.

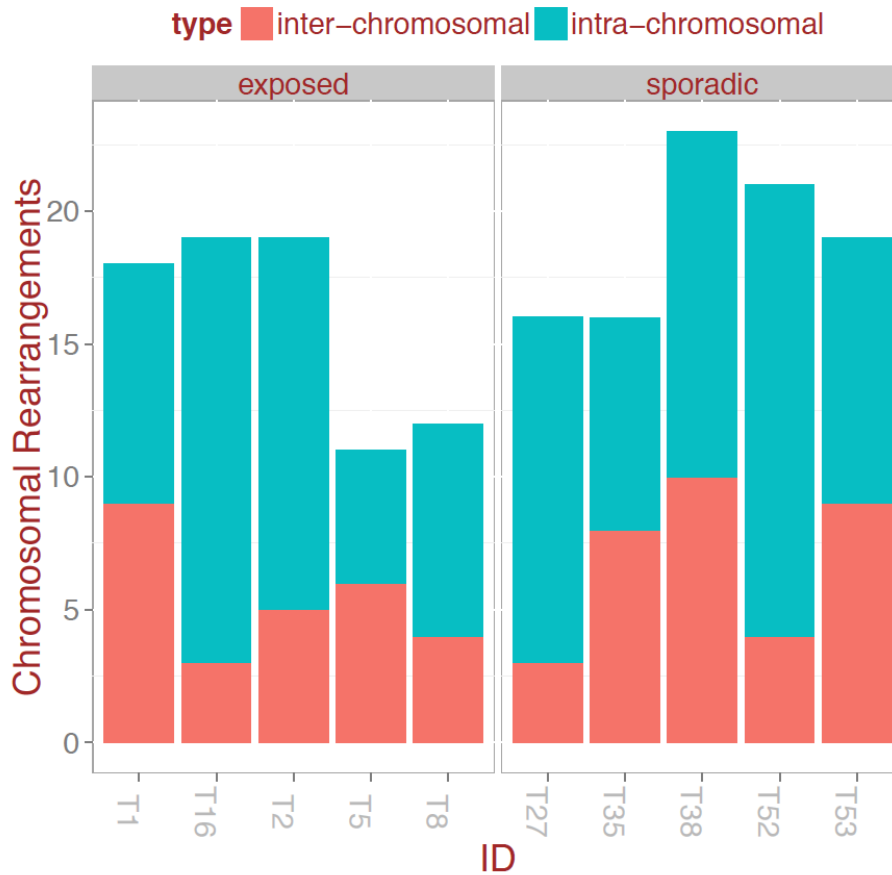

**Supplementary Figure 5: Total somatic chromosomal rearrangement counts in WGS of papillary thyroid cancers samples from radiation-exposed and sporadic cases.** Inter-chromosomal rearrangements are shown in red, and intra-chromosomal rearrangements in blue. There is no significant difference in the frequency of these rearrangements between the two groups ( $p=0.288$ ).

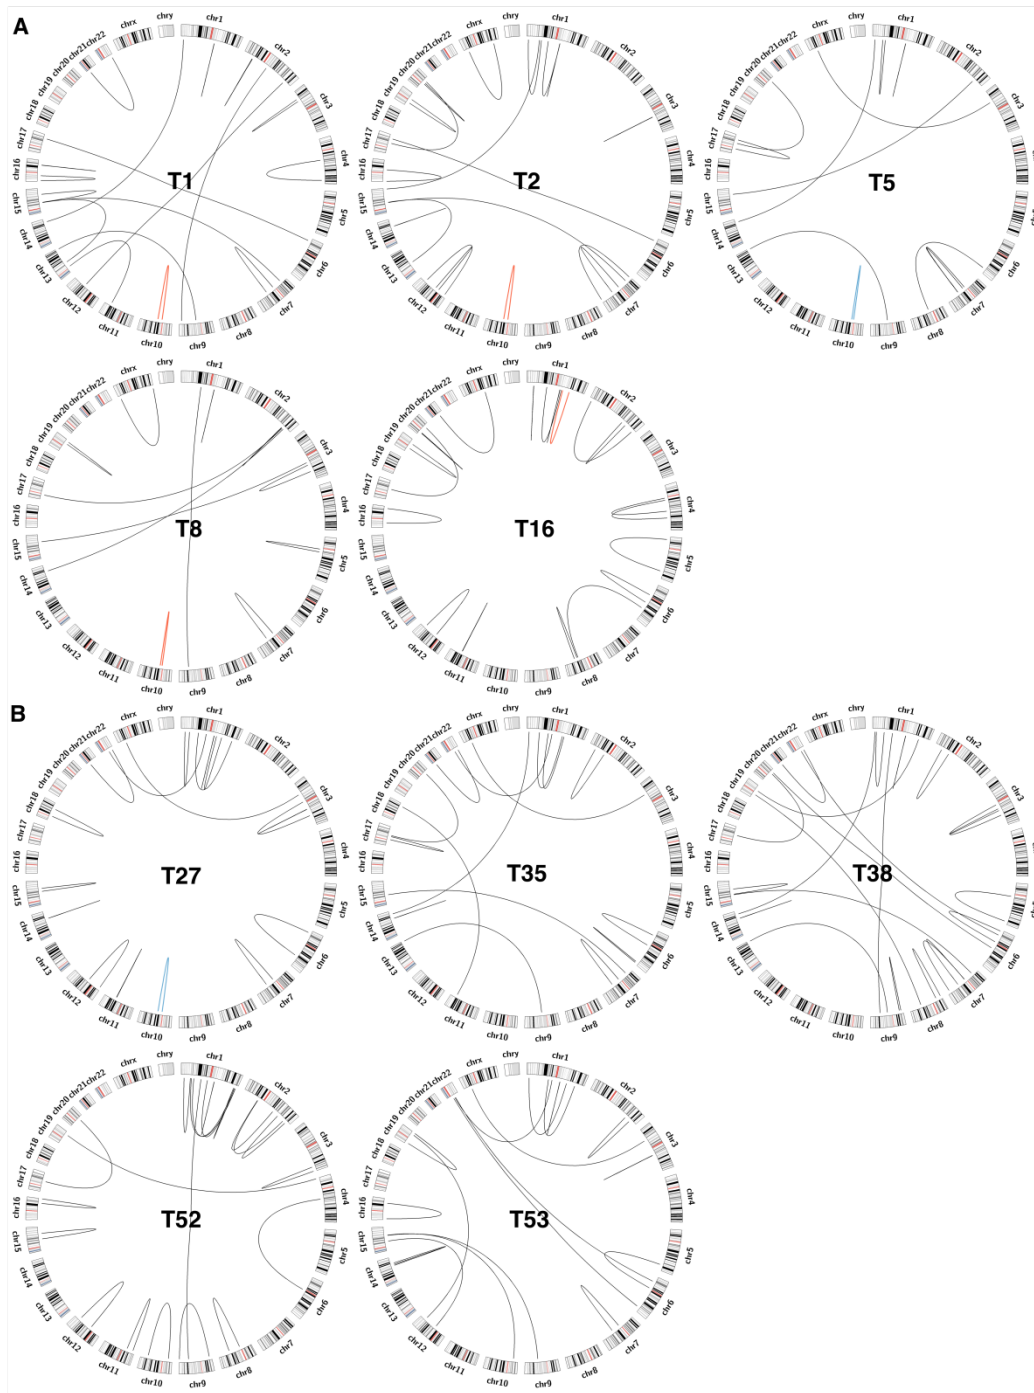

**Supplementary Figure 6: Circos plots of somatic chromosomal rearrangements in thyroid cancers from radiation-exposed (A) and sporadic cases (B), as detected by low pass whole genome sequencing. Red lines represent the confirmed known somatic chromosomal rearrangement drivers called from the breakpoint detection pipeline (BreakDancer). Blue lines represent the driver rearrangements supported by paired end reads spanning previously identified drivers mutations. Black lines represent all other somatic chromosomal rearrangements as detected by BreakDancer. Known somatic chromosomal rearrangements: T1: RET/PTC1; T2: RET/PTC1; T5: RET/PTC3; T8: RET/PTC3; T16 NTRK1/TPR; T27: RET/PTC1.**

**Supplementary Table 1: Characteristics of radiation-exposed and sporadic pediatric thyroid cancers investigated in this study**

**A. Radiation-exposed**

| <b>Sample ID</b> | <b>DOS</b> | <b>Age at op</b> | <b>Sex</b> | <b>Country</b> | <b>Oblast</b> | <b>Lesion size (cm)</b> |
|------------------|------------|------------------|------------|----------------|---------------|-------------------------|
| T1               | 7-Jul-99   | 15.13            | F          | Ukraine        | Kiev          | 4.2                     |
| T2               | 12-Jan-99  | 17.01            | F          | Ukraine        | Zhytomyr      | 2.8                     |
| T3               | 19-Mar-04  | 18.79            | F          | Ukraine        | Zhytomyr      | 1.7                     |
| T4               | 8-Jun-06   | 20.64            | F          | Ukraine        | Kiev          | 3.5                     |
| T5               | 9-Apr-99   | 13.55            | F          | Ukraine        | Kiev          | 2                       |
| T6               | 1-Nov-98   | 14.12            | F          | Ukraine        | Kiev          | 1.5                     |
| T7               | 10-Dec-98  | 15.38            | M          | Ukraine        | Kiev          | 1.3                     |
| T8               | 24-Dec-02  | 16.89            | F          | Ukraine        | Rovno         | 2.3                     |
| T9               | 21-Feb-03  | 16.92            | M          | Ukraine        | Kiev          | 5                       |
| T10              | 12-Sep-00  | 18.62            | F          | Ukraine        | Kiev          | 3.5                     |
| T11              | 21-Dec-99  | 17.11            | M          | Ukraine        | Kiev          | 2.5                     |
| T12              | 27-Jan-00  | 14.08            | F          | Ukraine        | Kiev          | 2.5                     |
| T13              | 16-Feb-07  | 22.97            | F          | Ukraine        | Kiev          | 3.4                     |
| T14              | 27-Nov-98  | 22.52            | F          | Ukraine        | Kiev          | 1.3                     |
| T15              | 22-Jun-01  | 18.53            | F          | Ukraine        | Kiev          | 2.8                     |
| T16              | 16-Feb-99  | 13.43            | M          | Ukraine        | Chernigov     | 1.5                     |
| T17              | 21-Dec-01  | 19.99            | F          | Ukraine        | Kiev          | 3.7                     |
| T18              | 5-Nov-03   | 19.61            | F          | Ukraine        | Kiev          | 3.5                     |
| T19              | 17-Mar-04  | 20.94            | F          | Ukraine        | Zhytomyr      | 3.8                     |
| T20              | 1-Apr-04   | 22.84            | M          | Ukraine        | Chercassy     | 3                       |
| T21              | 26-Apr-02  | 16.01            | F          | Ukraine        | Rovno         | 3.8                     |
| T22              | 23-Apr-99  | 15.69            | F          | Ukraine        | Zhytomyr      | 5.9                     |
| T23              | 21-Sep-99  | 13.85            | F          | Ukraine        | Kiev          | 2                       |
| T24              | 15-Nov-00  | 21.28            | M          | Ukraine        | Kiev          | 3                       |
| T25              | 7-Jul-05   | 20.32            | M          | Ukraine        | Chernigov     | 2.6                     |
| T26              | 4-Nov-05   | 22.08            | F          | Ukraine        | Zhytomyr      | 3.2                     |

## B. Sporadic

| Sample ID | DOS       | Age at op | Sex | Country | Oblast    | Lesion size (cm) |
|-----------|-----------|-----------|-----|---------|-----------|------------------|
| T27       | 21-Oct-09 | 17.17     | F   | Ukraine | Kiev      | 4.5              |
| T28       | 11-Jan-07 | 16.62     | M   | Ukraine | Kiev      | 2.5              |
| T29       | 20-Mar-07 | 15.15     | F   | Ukraine | Kiev      | 2.4              |
| T30       | 8-Jun-07  | 18.22     | F   | Ukraine | Chernigov | 2.8              |
| T31       | 14-Nov-07 | 12.38     | F   | Ukraine | Zhytomyr  | 3                |
| T32       | 5-Jun-02  | 14.15     | F   | Ukraine | Chercassy | 7.5              |
| T33       | 11-Dec-09 | 17.07     | F   | Ukraine | Kiev      | 2.5              |
| T34       | 1-Jun-06  | 18.46     | F   | Ukraine | Kiev      | 3                |
| T35       | 31-May-07 | 11.01     | F   | Ukraine | Chernigov | 3.5              |
| T36       | 15-Jun-07 | 15.56     | F   | Ukraine | Zhytomyr  | 1.7              |
| T37       | 19-Jul-05 | 15.22     | F   | Ukraine | Sumy      | 4.5              |
| T38       | 17-Apr-09 | 19.82     | F   | Ukraine | Chernigov | 1.3              |
| T39       | 14-May-09 | 17.53     | F   | Ukraine | Kiev      | 3.5              |
| T40       | 21-May-09 | 13.06     | F   | Ukraine | Kiev      | 2.5              |
| T41       | 23-Mar-99 | 11.56     | F   | Ukraine | Kiev      | 2.7              |
| T42       | 4-Nov-08  | 19.32     | M   | Ukraine | Kiev      | 4.3              |
| T43       | 12-Mar-03 | 13.97     | F   | Ukraine | Kiev      | 4.5              |
| T44       | 17-Jun-04 | 17.09     | F   | Ukraine | Chercassy | 1.7              |
| T45       | 10-Feb-06 | 16.44     | F   | Ukraine | Zhytomyr  | 3                |
| T46       | 21-Feb-06 | 16.07     | F   | Ukraine | Sumy      | 1.2              |
| T47       | 30-Nov-07 | 18.01     | F   | Ukraine | Sumy      | 3.8              |
| T48       | 11-Dec-07 | 18.33     | F   | Ukraine | Sumy      | 5.2              |
| T49       | 13-May-08 | 19.62     | F   | Ukraine | Kiev      | 2.7              |
| T50       | 25-Apr-00 | 8.79      | F   | Ukraine | Zhytomyr  | 1.6              |
| T51       | 16-May-08 | 16.63     | F   | Ukraine | Kiev      | 3                |
| T52       | 27-Feb-09 | 17.69     | F   | Ukraine | Kiev      | 5.5              |
| T53       | 15-Sep-09 | 5.78      | F   | Ukraine | Rovno     | 3                |

DOS, date of surgery.

**Supplementary Table 2: Complete list of somatic fusions identified by RNAseq in each tumor sample.**

| Sample | Alphabetical     | Directional       | Type      | Exon1                               | Exon2                              | Distance | In_frame | Note                                   |
|--------|------------------|-------------------|-----------|-------------------------------------|------------------------------------|----------|----------|----------------------------------------|
| T23    | AGK_BRAF         | BRAF->AGK         | intra-chr | chr7:AGK:141292945:141292985:+      | chr7:BRAF:140500161:140500281:-    | 792664   | yes      | coding to coding fusion                |
| T23    | SIDT2_TAGLN      | SIDT2->TAGLN      | intra-chr | chr11:SIDT2:117066517:117066631:+   | chr11:TAGLN:117073717:117073909:+  | 7086     | no       | Coding of SIDT2 to 5' of TAGLN         |
| T23    | VAMP5_VAMP8      | VAMP8->VAMP5      | intra-chr | chr2:VAMP5:85818847:85818985:+      | chr2:VAMP8:85806131:85806290:+     | 12557    | yes      | coding to coding fusion                |
| T26    | CHCHD10_VPREB3   | CHCHD10->VPREB3   | intra-chr | chr22:CHCHD10:24108314:24108462:-   | chr22:VPREB3:24094929:24095385:-   | 12929    | yes      | coding to coding fusion                |
| T26    | CHCHD10_VPREB3   | CHCHD10->VPREB3   | intra-chr | chr22:CHCHD10:24110020:24110141:-   | chr22:VPREB3:24094929:24095385:-   | 14635    | no       | coding to coding fusion                |
| T26    | KIAA1984_TMEM141 | TMEM141->KIAA1984 | intra-chr | chr9:KIAA1984:139693553:139693675:+ | chr9:TMEM141:139686702:139686810:+ | 6743     | yes      | coding to coding fusion                |
| T26    | SCNN1A_TNFRSF1A  | SCNN1A->TNFRSF1A  | intra-chr | chr12:SCNN1A:6457892:6457968:-      | chr12:TNFRSF1A:6443256:6443410:-   | 14482    | yes      | coding to coding fusion                |
| T24    | ETV6_NTRK3       | NTRK3->ETV6       | inter-chr | chr12:ETV6:12022357:12022903:+      | chr15:NTRK3:88669501:88669604:-    | NA       | yes      | coding to coding fusion                |
| T24    | ETV6_NTRK3       | ETV6->NTRK3       | inter-chr | chr12:ETV6:12006360:12006495:+      | chr15:NTRK3:88576087:88576276:-    | NA       | yes      | coding to coding fusion                |
| T24    | IPO11_LRRC70     | LRRC70->IPO11     | intra-chr | chr5:IPO11:61887403:61887499:+      | chr5:LRRC70:61874561:61874762:+    | 12641    | NA       | 5'UTR of LRRC70 into the coding IPO11  |
| T25    | CREB3L2_PPARG    | PPARG->CREB3L2    | inter-chr | chr7:CREB3L2:137600582:137600758:-  | chr3:PPARG:12329348:12329519:+     | NA       | NA       | 5'UTR of PPARG into the coding CREB3L2 |
| T25    | CREB3L2_PPARG    | PPARG->CREB3L2    | inter-chr | chr7:CREB3L2:137600582:137600758:-  | chr3:PPARG:12353878:12353952:+     | NA       | NA       | 5'UTR of PPARG into the coding CREB3L2 |
| T25    | CREB3L2_PPARG    | CREB3L2->PPARG    | inter-chr | chr7:CREB3L2:137612895:137613112:-  | chr3:PPARG:12421202:12421430:+     | NA       | yes      | coding to coding fusion                |
| T25    | CTSD_IFITM10     | CTSD->IFITM10     | intra-chr | chr11:CTSD:1775032:1775131:-        | chr11:IFITM10:1768896:1769349:-    | 5683     | yes      | coding to coding fusion                |
| T25    | GALT_IL11RA      | GALT->IL11RA      | intra-chr | chr9:GALT:34649406:34649561:+       | chr9:IL11RA:34655214:34655314:+    | 5653     | yes      | coding to coding fusion                |
| T25    | SCNN1A_TNFRSF1A  | SCNN1A->TNFRSF1A  | intra-chr | chr12:SCNN1A:6457892:6457968:-      | chr12:TNFRSF1A:6443256:6443410:-   | 14482    | yes      | coding to coding fusion                |

**Supplementary Table 3: Somatic non-synonymous variants found by RNAseq in radiation-exposed pediatric thyroid cancers**

| Sample | Somatic | Chr   | Pos       | Gene          | Aminoacid change /Indel effect | Tumor alternative allele frequency | Normal alternative allele frequency |
|--------|---------|-------|-----------|---------------|--------------------------------|------------------------------------|-------------------------------------|
| T23    | SNVs    | chr12 | 94772742  | CCDC41        | R209Q                          | 60                                 | 0                                   |
| T26    | SNVs    | chr14 | 51238096  | NIN           | H358Y                          | 36.36                              | 0                                   |
| T26    | SNVs    | chr14 | 81609676  | TSHR          | S425I                          | 29.92                              | 0                                   |
| T26    | SNVs    | chr19 | 1484036   | PCSK4         | L387V                          | 70                                 | 0                                   |
| T26    | SNVs    | chr22 | 20094835  | DGCR8         | I647V                          | 32.14                              | 0                                   |
| T26    | SNVs    | chr22 | 45821956  | RIBC2         | S263W                          | 70                                 | 0                                   |
| T26    | SNVs    | chr9  | 35853701  | TMEM8B        | R428H                          | 28.07                              | 0                                   |
| T24    | SNVs    | chr1  | 1666175   | SLC35E2       | R229H                          | 24.14                              | 0                                   |
| T24    | SNVs    | chr1  | 146049196 | NBPF11,NBPF24 | I392L,I338L                    | 66.67                              | 0                                   |
| T24    | SNVs    | chr19 | 40383934  | FCGBP         | D3226N                         | 26.92                              | 0                                   |
| T24    | SNVs    | chr19 | 40400342  | FCGBP         | R1916H                         | 94.89                              | 0                                   |
| T24    | SNVs    | chr7  | 107834613 | NRCAM         | P526A                          | 44.44                              | 0                                   |
| T25    | SNVs    | chr1  | 16377387  | CLCNKB        | H188Q                          | 30                                 | 0                                   |
| T25    | SNVs    | chr19 | 47910338  | MEIS3         | T314I                          | 40                                 | 0                                   |
| T25    | SNVs    | chr6  | 31846741  | SLC44A4       | R6L                            | 43.14                              | 0                                   |
| T23    | INDELS  | chr10 | 32582030  | EPC1          | FRAME_SHIFT                    | 36.36                              | 0                                   |
| T23    | INDELS  | chr14 | 60585130  | C14orf135     | FRAME_SHIFT                    | 29.63                              | 0                                   |
| T23    | INDELS  | chr15 | 34445167  | C15orf29      | FRAME_SHIFT                    | 33.33                              | 0                                   |
| T23    | INDELS  | chr16 | 68598462  | ZFP90         | FRAME_SHIFT                    | 25                                 | 0                                   |
| T23    | INDELS  | chr18 | 59739950  | PIGN          | FRAME_SHIFT                    | 20                                 | 0                                   |
| T23    | INDELS  | chr2  | 10051679  | TAF1B         | FRAME_SHIFT                    | 22.73                              | 0                                   |
| T23    | INDELS  | chr3  | 32754743  | CNOT10        | FRAME_SHIFT                    | 26.32                              | 0                                   |
| T26    | INDELS  | chr1  | 225142679 | DNAH14        | FRAME_SHIFT                    | 21.74                              | 0                                   |
| T26    | INDELS  | chr15 | 52662410  | MYO5A         | FRAME_SHIFT                    | 21.05                              | 0                                   |
| T26    | INDELS  | chr17 | 26925946  | SPAG5         | FRAME_SHIFT                    | 21.62                              | 0                                   |
| T26    | INDELS  | chr19 | 58319467  | ZNF552        | FRAME_SHIFT                    | 40                                 | 0                                   |
| T26    | INDELS  | chr21 | 47773083  | PCNT          | FRAME_SHIFT                    | 29.41                              | 0                                   |
| T26    | INDELS  | chr4  | 129869674 | SCLT1         | FRAME_SHIFT                    | 27.78                              | 0                                   |
| T24    | INDELS  | chr11 | 64088132  | PRDX5         | FRAME_SHIFT                    | 57.14                              | 0                                   |
| T24    | INDELS  | chr17 | 78302130  | RNF213        | FRAME_SHIFT                    | 25.64                              | 0                                   |
| T24    | INDELS  | chr7  | 50514059  | FIGNL1        | FRAME_SHIFT                    | 44.44                              | 0                                   |
| T25    | INDELS  | chr4  | 57220268  | AASDH         | FRAME_SHIFT                    | 22.22                              | 0                                   |



**Supplementary Table 4: Somatic chromosomal rearrangements detected by low pass WGS in radiation-exposed and sporadic PTCs.**

| ID | Chr.1 | Chr.2 | Gene1                   | Gene2                     | Type       | Coverage | Position 1 | Position 2 | Group   |
|----|-------|-------|-------------------------|---------------------------|------------|----------|------------|------------|---------|
| T2 | chr1  | chr1  | KCNAB2                  | DOCK7                     | intra-chr. | 2        | 6116348    | 63090946   | exposed |
| T2 | chr1  | chr1  | MTF2                    | PDE4DIP                   | intra-chr. | 2        | 93552528   | 145022900  | exposed |
| T2 | chr1  | chr1  | NBPF9                   | PDE4DIP                   | intra-chr. | 5        | 144680304  | 144954528  | exposed |
| T2 | chr1  | chr15 | YIPF1                   | MEF2A                     | inter-chr. | 3        | 54324429   | 100112969  | exposed |
| T2 | chr10 | chr10 | RET                     | CCDC6                     | intra-chr. | 7        | 43610671   | 61657290   | exposed |
| T2 | chr12 | chr12 | GXYLT1                  | MYO1A                     | intra-chr. | 2        | 42533100   | 57438296   | exposed |
| T2 | chr12 | chr12 | RIMKLB                  | WSCD2                     | intra-chr. | 2        | 8901787    | 108616919  | exposed |
| T2 | chr13 | chr15 | ENOX1                   | TYRO3                     | inter-chr. | 5        | 44069573   | 41871244   | exposed |
| T2 | chr14 | chr14 | RBM25                   | PSEN1                     | intra-chr. | 7        | 73552733   | 73608533   | exposed |
| T2 | chr16 | chr16 | LUC7L                   | ZNF423                    | intra-chr. | 2        | 265617     | 49838363   | exposed |
| T1 | chr1  | chr1  | NBPF9                   | PDE4DIP                   | intra-chr. | 5        | 144680292  | 144954536  | exposed |
| T1 | chr1  | chr14 | SLC2A5                  | BTBD7                     | inter-chr. | 13       | 9121960    | 93712524   | exposed |
| T1 | chr10 | chr10 | RET                     | CCDC6                     | intra-chr. | 12       | 43611594   | 61615267   | exposed |
| T1 | chr11 | chr13 | DDX10                   | SKA3                      | inter-chr. | 11       | 108586716  | 21727905   | exposed |
| T1 | chr13 | chr15 | ENOX1                   | TYRO3                     | inter-chr. | 10       | 44069703   | 41869990   | exposed |
| T1 | chr15 | chr15 | TYRO3                   | ETFA                      | intra-chr. | 2        | 41853839   | 76553315   | exposed |
| T1 | chr16 | chr16 | NAA60                   | PRKCB                     | intra-chr. | 2        | 3528177    | 24015208   | exposed |
| T1 | chr16 | chr16 | WWP2                    | DDX19B                    | intra-chr. | 2        | 69932549   | 70327171   | exposed |
| T1 | chr2  | chr12 | ERBB4                   | PPP1R12A                  | inter-chr. | 3        | 212279972  | 80310032   | exposed |
| T1 | chr2  | chr2  | MTA3                    | LRPPRC                    | intra-chr. | 3        | 42798222   | 44142849   | exposed |
| T1 | chr2  | chr9  | DPP10                   | SET                       | inter-chr. | 8        | 116377141  | 131457063  | exposed |
| T1 | chr21 | chr22 | BAGE3,BAGE2,BAGE5,BAGE4 | FBLN1                     | inter-chr. | 7        | 11023095   | 45991601   | exposed |
| T1 | chr3  | chr3  | CRTAP                   | ANO10                     | intra-chr. | 2        | 33176800   | 43512365   | exposed |
| T1 | chr4  | chr4  | FAM13A                  | ASB5                      | intra-chr. | 2        | 89672634   | 177170739  | exposed |
| T1 | chr6  | chr17 | PHACTR1                 | PRKCA                     | inter-chr. | 7        | 13191467   | 64637361   | exposed |
| T1 | chr7  | chr15 | CBX3                    | C15orf57                  | inter-chr. | 6        | 26252774   | 40854284   | exposed |
| T1 | chr7  | chr7  | STAG3L4                 | LOC100289561,LOC100630923 | intra-chr. | 13       | 66769841   | 102018998  | exposed |
| T1 | chr9  | chr13 | LOC642236               | COL4A1                    | inter-chr. | 9        | 68434485   | 110874356  | exposed |
| T2 | chr17 | chr20 | CDC27                   | PCIF1                     | inter-chr. | 9        | 45214025   | 44570372   | exposed |
| T2 | chr19 | chr19 | SLC35E1                 | PDCD2L                    | intra-chr. | 2        | 16661902   | 34898133   | exposed |
| T2 | chr20 | chr20 | COMMD7                  | ARHGAP40                  | intra-chr. | 2        | 31323626   | 37272017   | exposed |
| T2 | chr3  | chr3  | STXBP5L                 | EAF2                      | intra-chr. | 8        | 120912795  | 121577505  | exposed |
| T2 | chr6  | chr17 | PHACTR1                 | PRKCA                     | inter-chr. | 6        | 13191424   | 64637318   | exposed |
| T2 | chr7  | chr15 | CBX3                    | C15orf57                  | inter-chr. | 15       | 26252905   | 40853340   | exposed |
| T2 | chr7  | chr7  | GNA12                   | PTPRN2                    | intra-chr. | 2        | 2865759    | 158284085  | exposed |
| T2 | chr7  | chr7  | STAG3L4                 | LOC100289561,LOC100630923 | intra-chr. | 19       | 66769495   | 102019027  | exposed |
| T2 | chrX  | chrX  | BEND2                   | MST4                      | intra-chr. | 2        | 18229512   | 131165028  | exposed |
| T5 | chr1  | chr1  | NBPF9                   | PDE4DIP                   | intra-chr. | 5        | 144680248  | 144954538  | exposed |

| ID  | Chr.1 | Chr.2 | Gene1     | Gene2                     | Type       | Coverage | Position 1 | Position 2 | Group   |
|-----|-------|-------|-----------|---------------------------|------------|----------|------------|------------|---------|
| T5  | chr1  | chr1  | PTPRF     | HEATR8,HEATR8-TTC4        | intra-chr. | 2        | 44020913   | 55174458   | exposed |
| T5  | chr1  | chr14 | SLC2A5    | BTBD7                     | inter-chr. | 14       | 9121847    | 93712560   | exposed |
| T5  | chr17 | chr17 | SPECC1    | MIR548W,MARCH10           | intra-chr. | 2        | 20201194   | 60819385   | exposed |
| T5  | chr17 | chr20 | CDC27     | PCIF1                     | inter-chr. | 15       | 45213111   | 44570629   | exposed |
| T5  | chr2  | chr15 | ALS2CR11  | ETFA                      | inter-chr. | 4        | 202475269  | 76540787   | exposed |
| T5  | chr3  | chrX  | LOC646498 | DMD                       | inter-chr. | 4        | 49218278   | 32000611   | exposed |
| T5  | chr6  | chr8  | AKAP12    | RAB2A                     | inter-chr. | 7        | 151653644  | 61526247   | exposed |
| T5  | chr7  | chr7  | STAG3L4   | LOC100289561,LOC100630923 | intra-chr. | 15       | 66769407   | 102019657  | exposed |
| T5  | chr7  | chr7  | STYXL1    | NAPEPLD                   | intra-chr. | 2        | 75659291   | 102778761  | exposed |
| T5  | chr9  | chr13 | LOC642236 | COL4A1                    | inter-chr. | 7        | 68434819   | 110874401  | exposed |
| T8  | chr1  | chr1  | NBPF9     | PDE4DIP                   | intra-chr. | 4        | 144680264  | 144954530  | exposed |
| T8  | chr1  | chr9  | COL24A1   | C9orf156                  | inter-chr. | 5        | 86399171   | 100675648  | exposed |
| T8  | chr10 | chr10 | RET       | NCOA4                     | intra-chr. | 3        | 43611793   | 51583480   | exposed |
| T8  | chr19 | chr19 | MEGF8     | ZNF600                    | intra-chr. | 2        | 42841628   | 53275510   | exposed |
| T8  | chr2  | chr14 | SPAG16    | NRXN3                     | inter-chr. | 7        | 214761655  | 79654026   | exposed |
| T8  | chr2  | chr17 | C2orf80   | SPECC1                    | inter-chr. | 5        | 209033628  | 19995215   | exposed |
| T8  | chr2  | chr2  | ABI2      | PARD3B                    | intra-chr. | 2        | 204242988  | 205801045  | exposed |
| T8  | chr3  | chr15 | IGSF11    | THSD4                     | inter-chr. | 12       | 118698224  | 71491835   | exposed |
| T8  | chr3  | chr3  | NEK11     | PPM1L                     | intra-chr. | 4        | 130817209  | 160765678  | exposed |
| T8  | chr5  | chr5  | ARL15     | MAST4                     | intra-chr. | 2        | 53595815   | 66452136   | exposed |
| T8  | chr7  | chr7  | STAG3L4   | LOC100289561,LOC100630923 | intra-chr. | 16       | 66769416   | 102019056  | exposed |
| T8  | chrX  | chrX  | HDHD1     | MPP1                      | intra-chr. | 2        | 7031201    | 154024054  | exposed |
| T16 | chr1  | chr1  | CLCA1     | PI4KB                     | intra-chr. | 2        | 86962406   | 151272918  | exposed |
| T16 | chr1  | chr1  | EPB41     | PTPRU                     | intra-chr. | 2        | 29301481   | 29597218   | exposed |
| T16 | chr1  | chr1  | NBPF9     | PDE4DIP                   | intra-chr. | 3        | 144680334  | 144954555  | exposed |
| T16 | chr1  | chr1  | NTRK1     | MIR548F1,TPR              | intra-chr. | 10       | 156844239  | 186319105  | exposed |
| T16 | chr11 | chr11 | DLG2      | ME3                       | intra-chr. | 5        | 85217640   | 86254799   | exposed |
| T16 | chr12 | chr12 | ATF7      | BRAP                      | intra-chr. | 2        | 53931529   | 112119128  | exposed |
| T16 | chr16 | chr16 | TMC5      | PLCG2                     | intra-chr. | 2        | 19481158   | 81896154   | exposed |
| T16 | chr17 | chr20 | CDC27     | PCIF1                     | inter-chr. | 10       | 45213111   | 44570389   | exposed |
| T16 | chr19 | chr19 | PBX4      | TMEM91                    | intra-chr. | 3        | 19720966   | 41876476   | exposed |
| T16 | chr2  | chr2  | KLF11     | FBXO36                    | intra-chr. | 2        | 10185180   | 230826223  | exposed |
| T16 | chr2  | chr2  | TLK1      | MFSD6                     | intra-chr. | 2        | 172048248  | 191297328  | exposed |
| T16 | chr20 | chr20 | ISM1      | MACROD2                   | intra-chr. | 2        | 13249500   | 15664897   | exposed |
| T16 | chr21 | chrX  | GRIK1     | PCDH11X                   | inter-chr. | 3        | 30942674   | 91828049   | exposed |
| T16 | chr4  | chr4  | LPHN3     | NAA15                     | intra-chr. | 2        | 62658800   | 140242635  | exposed |
| T16 | chr4  | chr4  | USP46     | RRH                       | intra-chr. | 2        | 53511493   | 110756281  | exposed |
| T16 | chr5  | chr5  | CTNND2    | GLRA1                     | intra-chr. | 2        | 11494566   | 151277551  | exposed |
| T16 | chr6  | chr6  | ELOVL5    | MDN1                      | intra-chr. | 2        | 53196119   | 90461029   | exposed |
| T16 | chr6  | chr8  | MAN1A1    | SNX16                     | inter-chr. | 6        | 119558632  | 82754446   | exposed |

| ID  | Chr.1 | Chr.2 | Gene1                   | Gene2                     | Type       | Coverage | Position 1 | Position 2 | Group    |
|-----|-------|-------|-------------------------|---------------------------|------------|----------|------------|------------|----------|
| T16 | chr8  | chr8  | WWP1                    | STK3                      | intra-chr. | 2        | 87421039   | 99646721   | exposed  |
| T27 | chr1  | chr1  | ASH1L                   | RASAL2                    | intra-chr. | 2        | 155440438  | 178225665  | sporadic |
| T27 | chr1  | chr1  | FPGT-TNNI3K,TNNI3K      | DNAH14                    | intra-chr. | 2        | 75001409   | 225187293  | sporadic |
| T27 | chr1  | chr1  | NBPF9                   | PDE4DIP                   | intra-chr. | 5        | 144680272  | 144954552  | sporadic |
| T27 | chr1  | chr1  | SPATA21                 | ZMYM4                     | intra-chr. | 2        | 16762241   | 35884235   | sporadic |
| T27 | chr1  | chr22 | C1orf194                | UQCR10                    | inter-chr. | 5        | 109651044  | 30163398   | sporadic |
| T27 | chr11 | chr11 | DLG2                    | ME3                       | intra-chr. | 2        | 85217654   | 86255789   | sporadic |
| T27 | chr12 | chr12 | FGF6                    | FAM19A2                   | intra-chr. | 2        | 4547557    | 62384132   | sporadic |
| T27 | chr14 | chr14 | RBM25                   | PSEN1                     | intra-chr. | 11       | 73551716   | 73608539   | sporadic |
| T27 | chr15 | chr15 | CCPG1,DYX1C1-CCPG1      | MIR548H4                  | intra-chr. | 2        | 55672749   | 69120363   | sporadic |
| T27 | chr18 | chr18 | LAMA3                   | WDR7                      | intra-chr. | 2        | 21496141   | 54375094   | sporadic |
| T27 | chr21 | chr22 | BAGE3,BAGE2,BAGE5,BAGE4 | FBLN1                     | inter-chr. | 12       | 11023289   | 45991524   | sporadic |
| T27 | chr3  | chr3  | CADM2                   | MIR548H2                  | intra-chr. | 2        | 85225492   | 151488160  | sporadic |
| T27 | chr3  | chr3  | STXBP5L                 | EAF2                      | intra-chr. | 3        | 120912667  | 121577417  | sporadic |
| T27 | chr3  | chrX  | LOC646498               | DMD                       | inter-chr. | 4        | 49218270   | 32001142   | sporadic |
| T27 | chr6  | chr6  | ADTRP                   | TPD52L1                   | intra-chr. | 2        | 11736193   | 125484860  | sporadic |
| T27 | chr7  | chr7  | STAG3L4                 | LOC100289561,LOC100630923 | intra-chr. | 11       | 66769380   | 102018999  | sporadic |
| T35 | chr1  | chr1  | DIO1                    | DAP3                      | intra-chr. | 2        | 54366748   | 155700868  | sporadic |
| T35 | chr1  | chr1  | EVI5                    | NUF2                      | intra-chr. | 2        | 93169798   | 163311916  | sporadic |
| T35 | chr1  | chr14 | SLC2A5                  | BTBD7                     | inter-chr. | 12       | 9121755    | 93712056   | sporadic |
| T35 | chr1  | chr22 | C1orf194                | UQCR10                    | inter-chr. | 14       | 109650981  | 30163409   | sporadic |
| T35 | chr11 | chr18 | ARHGAP20                | CCDC102B                  | inter-chr. | 6        | 110496245  | 66572342   | sporadic |
| T35 | chr14 | chr14 | RBM25                   | PSEN1                     | intra-chr. | 13       | 73551948   | 73608554   | sporadic |
| T35 | chr17 | chr17 | SARM1                   | STAT5B                    | intra-chr. | 2        | 26720578   | 40385021   | sporadic |
| T35 | chr17 | chr20 | CDC27                   | PCIF1                     | inter-chr. | 10       | 45213105   | 44570629   | sporadic |
| T35 | chr2  | chr2  | ALK                     | STAMBP                    | intra-chr. | 2        | 29559033   | 74080414   | sporadic |
| T35 | chr21 | chr22 | BAGE3,BAGE2,BAGE5,BAGE4 | FBLN1                     | inter-chr. | 7        | 11023257   | 45991515   | sporadic |
| T35 | chr3  | chrX  | LOC646498               | DMD                       | inter-chr. | 14       | 49218369   | 32000635   | sporadic |
| T35 | chr6  | chr6  | GPLD1                   | C6orf147,KHDC1            | intra-chr. | 2        | 24451958   | 74005755   | sporadic |
| T35 | chr6  | chr6  | SLC22A2                 | PDE10A                    | intra-chr. | 2        | 160678483  | 166010292  | sporadic |
| T35 | chr7  | chr15 | CBX3                    | C15orf57                  | inter-chr. | 9        | 26248158   | 40853733   | sporadic |
| T35 | chr7  | chr7  | STAG3L4                 | LOC100289561,LOC100630923 | intra-chr. | 11       | 66769451   | 102019629  | sporadic |
| T35 | chr9  | chr13 | LOC642236               | COL4A1                    | inter-chr. | 8        | 68434548   | 110874969  | sporadic |
| T38 | chr1  | chr1  | DNAJC16                 | AGBL4                     | intra-chr. | 2        | 15889308   | 50133340   | sporadic |
| T38 | chr1  | chr1  | NBPF9                   | PDE4DIP                   | intra-chr. | 7        | 144680265  | 144954510  | sporadic |
| T38 | chr1  | chr14 | SLC2A5                  | BTBD7                     | inter-chr. | 11       | 9121864    | 93712567   | sporadic |
| T38 | chr1  | chr19 | CHI3L1                  | ZNF793                    | inter-chr. | 6        | 203150354  | 38031019   | sporadic |
| T38 | chr1  | chr9  | COL24A1                 | C9orf156                  | inter-chr. | 10       | 86399221   | 100675135  | sporadic |
| T38 | chr14 | chr14 | RBM25                   | PSEN1                     | intra-chr. | 13       | 73552879   | 73608536   | sporadic |
| T38 | chr15 | chr15 | UBR1                    | PTPLAD1                   | intra-chr. | 2        | 43243426   | 65835053   | sporadic |

| ID  | Chr.1 | Chr.2 | Gene1                   | Gene2                     | Type       | Coverage | Position 1 | Position 2 | Group    |
|-----|-------|-------|-------------------------|---------------------------|------------|----------|------------|------------|----------|
| T38 | chr17 | chr20 | CDC27                   | PCIF1                     | inter-chr. | 11       | 45213105   | 44570496   | sporadic |
| T38 | chr2  | chr2  | TTC27                   | CNRIP1                    | intra-chr. | 2        | 32983383   | 68531298   | sporadic |
| T38 | chr21 | chr22 | BAGE3,BAGE2,BAGE5,BAGE4 | FBLN1                     | inter-chr. | 7        | 11023295   | 45991509   | sporadic |
| T38 | chr3  | chr3  | ARHGAP31                | MCM2                      | intra-chr. | 3        | 119075643  | 127322495  | sporadic |
| T38 | chr3  | chr3  | MIR548G,COL8A1          | RNF13                     | intra-chr. | 2        | 99468841   | 149536385  | sporadic |
| T38 | chr5  | chr5  | PDE4D                   | KCNIP1                    | intra-chr. | 2        | 58753839   | 170033407  | sporadic |
| T38 | chr6  | chr20 | SLC35A1                 | TSHZ2                     | inter-chr. | 18       | 88217383   | 52021445   | sporadic |
| T38 | chr6  | chr22 | ACOT13                  | SYN3                      | inter-chr. | 9        | 24683764   | 32927902   | sporadic |
| T38 | chr6  | chr6  | FARS2                   | PRIM2                     | intra-chr. | 2        | 5360281    | 57389783   | sporadic |
| T38 | chr7  | chr15 | CBX3                    | C15orf57                  | inter-chr. | 11       | 26246109   | 40854225   | sporadic |
| T38 | chr7  | chr7  | GTF2IRD1P1              | ZNF425                    | intra-chr. | 2        | 66292534   | 148805570  | sporadic |
| T38 | chr7  | chr7  | STAG3L4                 | LOC100289561,LOC100630923 | intra-chr. | 21       | 66769767   | 102019047  | sporadic |
| T38 | chr8  | chr19 | C8orf37                 | CRTC1                     | inter-chr. | 3        | 96265755   | 18835172   | sporadic |
| T38 | chr8  | chr8  | CSMD1                   | DOCK5                     | intra-chr. | 3        | 2983198    | 25047191   | sporadic |
| T38 | chr9  | chr13 | LOC642236               | COL4A1                    | inter-chr. | 9        | 68434471   | 110874521  | sporadic |
| T38 | chr9  | chr9  | PTPRD                   | BNC2                      | intra-chr. | 2        | 9306942    | 16513699   | sporadic |
| T52 | chr1  | chr1  | ACOT11                  | WDR64                     | intra-chr. | 3        | 55019303   | 241854112  | sporadic |
| T52 | chr1  | chr1  | HIPK1                   | RGS7                      | intra-chr. | 3        | 114480803  | 241362838  | sporadic |
| T52 | chr1  | chr1  | NBPF9                   | PDE4DIP                   | intra-chr. | 6        | 144680319  | 144954549  | sporadic |
| T52 | chr1  | chr1  | PCNXL2                  | RYR2                      | intra-chr. | 3        | 233323067  | 237486004  | sporadic |
| T52 | chr1  | chr1  | ST3GAL3                 | LGALS8                    | intra-chr. | 2        | 44310458   | 236685528  | sporadic |
| T52 | chr1  | chr1  | VPS13D                  | MACF1                     | intra-chr. | 2        | 12451980   | 39904125   | sporadic |
| T52 | chr1  | chr9  | COL24A1                 | C9orf156                  | inter-chr. | 9        | 86399004   | 100675238  | sporadic |
| T52 | chr10 | chr10 | ITGA8                   | WBP1L                     | intra-chr. | 2        | 15574536   | 104538081  | sporadic |
| T52 | chr11 | chr11 | LMO1                    | PDHX                      | intra-chr. | 2        | 8255492    | 34953286   | sporadic |
| T52 | chr12 | chr12 | DIP2B                   | GIT2                      | intra-chr. | 2        | 51136872   | 110416421  | sporadic |
| T52 | chr15 | chr15 | GALK2                   | C15orf60                  | intra-chr. | 2        | 49453181   | 73778939   | sporadic |
| T52 | chr16 | chr16 | DDX19B,LOC100506083     | TCF25                     | intra-chr. | 2        | 70357898   | 89947056   | sporadic |
| T52 | chr17 | chr20 | CDC27                   | PCIF1                     | inter-chr. | 15       | 45213907   | 44570629   | sporadic |
| T52 | chr2  | chr2  | CWC22                   | MRPL44                    | intra-chr. | 2        | 180821390  | 224829327  | sporadic |
| T52 | chr2  | chr2  | PCBP1-AS1               | NEB                       | intra-chr. | 3        | 70289674   | 152429678  | sporadic |
| T52 | chr2  | chr2  | ZNF638                  | ERBB4                     | intra-chr. | 2        | 71596284   | 212619005  | sporadic |
| T52 | chr3  | chr3  | LINC00578               | TM4SF19-TCTEX1D2          | intra-chr. | 2        | 177337524  | 196047479  | sporadic |
| T52 | chr4  | chr19 | WHSC1                   | NPAS1                     | inter-chr. | 15       | 1881542    | 47529708   | sporadic |
| T52 | chr4  | chr6  | FAM190A                 | EYS                       | inter-chr. | 5        | 91966842   | 64665999   | sporadic |
| T52 | chr8  | chr8  | KIAA0146                | SDC2                      | intra-chr. | 2        | 48579626   | 97548766   | sporadic |
| T52 | chr9  | chr9  | PTPRD                   | EXD3                      | intra-chr. | 2        | 9901131    | 140313126  | sporadic |
| T53 | chr1  | chr1  | FNBP1L                  | RCOR3                     | intra-chr. | 2        | 93924032   | 211480440  | sporadic |
| T53 | chr1  | chr1  | NBPF9                   | PDE4DIP                   | intra-chr. | 8        | 144680249  | 144954561  | sporadic |
| T53 | chr1  | chr1  | SPSB1                   | RC3H1                     | intra-chr. | 2        | 9393955    | 173920308  | sporadic |

| ID  | Chr.1 | Chr.2 | Gene1     | Gene2                     | Type       | Coverage | Position 1 | Position 2 | Group    |
|-----|-------|-------|-----------|---------------------------|------------|----------|------------|------------|----------|
| T53 | chr1  | chr22 | C1orf194  | UQCR10                    | inter-chr. | 23       | 109651023  | 30163375   | sporadic |
| T53 | chr10 | chr15 | CACNB2    | VWA9                      | inter-chr. | 14       | 18603761   | 65873083   | sporadic |
| T53 | chr12 | chr15 | BAZ2A     | FSIP1                     | inter-chr. | 9        | 56989988   | 39994167   | sporadic |
| T53 | chr12 | chr19 | ANKRD13A  | FAM83E                    | inter-chr. | 6        | 110455585  | 49111873   | sporadic |
| T53 | chr14 | chr14 | DCAF5     | NRXN3                     | intra-chr. | 2        | 69595851   | 79889574   | sporadic |
| T53 | chr14 | chr14 | RBM25     | PSEN1                     | intra-chr. | 7        | 73551919   | 73608525   | sporadic |
| T53 | chr16 | chr16 | ZNF263    | HYDIN                     | intra-chr. | 2        | 3337587    | 71045674   | sporadic |
| T53 | chr19 | chr19 | MLLT1     | ZNF544                    | intra-chr. | 2        | 6266040    | 58744131   | sporadic |
| T53 | chr2  | chr2  | MFSD6     | SPAG16                    | intra-chr. | 3        | 191320652  | 215011418  | sporadic |
| T53 | chr3  | chr3  | STXBP5L   | EAF2                      | intra-chr. | 2        | 120912711  | 121577503  | sporadic |
| T53 | chr3  | chrX  | LOC646498 | DMD                       | inter-chr. | 12       | 49218432   | 32000683   | sporadic |
| T53 | chr5  | chr6  | ADAM19    | PRIM2                     | inter-chr. | 9        | 156917135  | 57480540   | sporadic |
| T53 | chr6  | chr22 | ACOT13    | SYN3                      | inter-chr. | 14       | 24683718   | 32927891   | sporadic |
| T53 | chr6  | chr22 | ESR1      | CABIN1                    | inter-chr. | 6        | 152221372  | 24461882   | sporadic |
| T53 | chr7  | chr7  | STAG3L4   | LOC100289561,LOC100630923 | intra-chr. | 13       | 66769664   | 102019855  | sporadic |
| T53 | chr9  | chr15 | RASEF     | KIAA0101                  | inter-chr. | 9        | 85622198   | 64664314   | sporadic |

Chr: chromosome

**Supplementary Table 5: Somatic SNV counts in WGS reads of exposed and sporadic PTC cases.**

| <b>Sample</b> | <b>Group</b> | <b>SNV</b> | <b>SNV per MB (%)</b> |
|---------------|--------------|------------|-----------------------|
| <b>T1</b>     | exposed      | 10         | 0.32302935            |
| <b>T2</b>     | exposed      | 14         | 0.41993815            |
| <b>T5</b>     | exposed      | 9          | 0.29072641            |
| <b>T8</b>     | exposed      | 9          | 0.29072641            |
| <b>T16</b>    | exposed      | 19         | 0.61375576            |
| <b>T27</b>    | sporadic     | 6          | 0.19381761            |
| <b>T35</b>    | sporadic     | 14         | 0.45224108            |
| <b>T38</b>    | sporadic     | 9          | 0.29072641            |
| <b>T52</b>    | sporadic     | 15         | 0.48454402            |
| <b>T53</b>    | sporadic     | 14         | 0.45224108            |

**Supplementary Table 6: Somatic non-synonymous coding missense SNVs in WGS reads of exposed and sporadic PTC cases.**

| Sample | Chromosome | Position  | Gene      | Aminoacid | Tumor frequency | Normal frequency | Group    |
|--------|------------|-----------|-----------|-----------|-----------------|------------------|----------|
| T1     | chr4       | 190874256 | FRG1      | T98M      | 24%             | 0%               | exposed  |
| T1     | chr6       | 29523676  | UBD       | C160S     | 63%             | 0%               | exposed  |
| T1     | chr7       | 100677816 | MUC17     | G1040E    | 56%             | 0%               | exposed  |
| T1     | chr10      | 135082346 | ADAM8     | F592L     | 57%             | 0%               | exposed  |
| T1     | chr10      | 135490610 | DUX4L2    | A74V      | 43%             | 0%               | exposed  |
| T1     | chr11      | 1027811   | MUC6      | V619M     | 80%             | 0%               | exposed  |
| T1     | chr11      | 58170291  | OR5B3     | I198V     | 71%             | 0%               | exposed  |
| T1     | chr14      | 22102439  | OR10G2    | R187P     | 67%             | 0%               | exposed  |
| T1     | chr19      | 55367314  | KIR3DL2   | A299D     | 71%             | 0%               | exposed  |
| T1     | chr20      | 55027815  | CASS4     | R528L     | 85%             | 0%               | exposed  |
| T16    | chr1       | 16902884  | NBPF1     | N666S     | 29%             | 0%               | exposed  |
| T16    | chr1       | 144886197 | PDE4DIP   | F1013I    | 53%             | 0%               | exposed  |
| T16    | chr2       | 97637905  | FAM178B   | I99M      | 75%             | 0%               | exposed  |
| T16    | chr2       | 133542574 | NCKAP5    | V604M     | 83%             | 0%               | exposed  |
| T16    | chr3       | 41756965  | ULK4      | V851I     | 63%             | 0%               | exposed  |
| T16    | chr6       | 69666684  | BAI3      | N503S     | 71%             | 0%               | exposed  |
| T16    | chr6       | 89926962  | GABRR1    | H27R      | 56%             | 0%               | exposed  |
| T16    | chr7       | 12269417  | TMEM106B  | T185S     | 60%             | 0%               | exposed  |
| T16    | chr10      | 129901726 | MKI67     | S2433N    | 86%             | 0%               | exposed  |
| T16    | chr14      | 20872881  | TEP1      | N307K     | 57%             | 0%               | exposed  |
| T16    | chr16      | 31925986  | ZNF267    | F139S     | 55%             | 0%               | exposed  |
| T16    | chr19      | 8398006   | KANK3     | E610K     | 75%             | 0%               | exposed  |
| T16    | chr19      | 55144100  | LILRB1    | T283A     | 71%             | 0%               | exposed  |
| T16    | chr20      | 2539387   | TMC2      | R123K     | 57%             | 0%               | exposed  |
| T16    | chr20      | 47258763  | PREX1     | V1240I    | 100%            | 0%               | exposed  |
| T16    | chr20      | 55108617  | FAM209B   | Q74K      | 67%             | 0%               | exposed  |
| T16    | chr21      | 14982886  | POTED     | G113S     | 71%             | 0%               | exposed  |
| T16    | chr22      | 19968971  | ARVCF     | P220L     | 56%             | 0%               | exposed  |
| T16    | chr22      | 41223190  | ST13      | M297I     | 67%             | 0%               | exposed  |
| T2     | chr3       | 39178808  | TTC21A    | R1086Q    | 75%             | 0%               | exposed  |
| T2     | chr4       | 17660082  | FAM184B   | R643H     | 63%             | 0%               | exposed  |
| T2     | chr7       | 101989035 | SPDYE6    | R280C     | 24%             | 0%               | exposed  |
| T2     | chr7       | 142574913 | TRPV6     | C157R     | 50%             | 0%               | exposed  |
| T2     | chr8       | 144893084 | SCRIB     | P422L     | 80%             | 0%               | exposed  |
| T2     | chr10      | 7749183   | ITIH2     | S60L      | 86%             | 0%               | exposed  |
| T2     | chr10      | 129905429 | MKI67     | V1199M    | 78%             | 0%               | exposed  |
| T2     | chr11      | 55563336  | OR5D14    | Q102L     | 44%             | 0%               | exposed  |
| T2     | chr13      | 100543573 | CLYBL     | G310E     | 63%             | 0%               | exposed  |
| T2     | chr15      | 43020983  | CDAN1     | R891C     | 78%             | 0%               | exposed  |
| T2     | chr16      | 320614    | RGS11     | R351W     | 71%             | 0%               | exposed  |
| T2     | chr16      | 84228770  | ADAD2     | G235R     | 88%             | 0%               | exposed  |
| T2     | chr19      | 59082368  | MZF1      | R130Q     | 71%             | 0%               | exposed  |
| T2     | chr20      | 3686436   | SIGLEC1   | V221M     | 100%            | 0%               | exposed  |
| T5     | chr1       | 26582091  | CEP85     | S213N     | 86%             | 0%               | exposed  |
| T5     | chr1       | 207646923 | CR2       | R671H     | 64%             | 0%               | exposed  |
| T5     | chr3       | 75787321  | ZNF717    | G485R     | 29%             | 0%               | exposed  |
| T5     | chr3       | 195513598 | MUC4      | P1618L    | 50%             | 0%               | exposed  |
| T5     | chr9       | 33798574  | PRSS3     | S239N     | 56%             | 0%               | exposed  |
| T5     | chr9       | 90503451  | FAM75E1   | R1350H    | 70%             | 0%               | exposed  |
| T5     | chr10      | 68040325  | CTNNA3    | S596N     | 75%             | 0%               | exposed  |
| T5     | chr10      | 101912064 | ERLIN1    | I291V     | 80%             | 0%               | exposed  |
| T5     | chr13      | 20277413  | PSPC1     | M492V     | 36%             | 0%               | exposed  |
| T8     | chr1       | 12854105  | PRAMEF1   | E110G     | 40%             | 0%               | exposed  |
| T8     | chr1       | 18023690  | ARHGEF10L | I1180V    | 67%             | 0%               | exposed  |
| T8     | chr8       | 11995062  | USP17L2   | A403V     | 67%             | 0%               | exposed  |
| T8     | chr8       | 132982824 | EFR3A     | N365D     | 63%             | 0%               | exposed  |
| T8     | chr8       | 145741702 | RECQL4    | E267D     | 71%             | 0%               | exposed  |
| T8     | chr9       | 2039793   | SMARCA2   | Q228P     | 78%             | 0%               | exposed  |
| T8     | chr14      | 24707479  | GMPR2     | G242D     | 50%             | 0%               | exposed  |
| T8     | chr15      | 63111739  | TLN2      | F2266L    | 56%             | 0%               | exposed  |
| T8     | chr22      | 32586926  | RFPL2     | S324G     | 63%             | 0%               | exposed  |
| T27    | chr3       | 148562310 | CPB1      | D208N     | 78%             | 0%               | sporadic |
| T27    | chr3       | 160804167 | B3GALNT1  | D126N     | 67%             | 0%               | sporadic |
| T27    | chr6       | 30993533  | MUC22     | R109G     | 80%             | 0%               | sporadic |

| Sample | Chromosome | Position  | Gene      | Aminoacid | Tumor frequency | Normal frequency | Group    |
|--------|------------|-----------|-----------|-----------|-----------------|------------------|----------|
| T27    | chr7       | 117188736 | CFTR      | N417K     | 83%             | 0%               | sporadic |
| T27    | chr18      | 61647069  | SERPINB8  | R68Q      | 71%             | 0%               | sporadic |
| T27    | chr19      | 41384675  | CYP2A7    | H223R     | 80%             | 0%               | sporadic |
| T35    | chr3       | 75715181  | FRG2C     | G280R     | 27%             | 0%               | sporadic |
| T35    | chr3       | 75786355  | ZNF717    | T807S     | 26%             | 0%               | sporadic |
| T35    | chr7       | 99696797  | MCM7      | N144S     | 63%             | 0%               | sporadic |
| T35    | chr7       | 100679760 | MUC17     | G1688E    | 57%             | 0%               | sporadic |
| T35    | chr7       | 102939136 | PMPCB     | S74Y      | 57%             | 0%               | sporadic |
| T35    | chr10      | 50025396  | WDFY4     | R1816Q    | 63%             | 0%               | sporadic |
| T35    | chr11      | 1018366   | MUC6      | A1479T    | 67%             | 0%               | sporadic |
| T35    | chr13      | 53217493  | HNRNPA1L2 | Y289C     | 71%             | 0%               | sporadic |
| T35    | chr14      | 45645715  | FANCM     | N1253S    | 75%             | 0%               | sporadic |
| T35    | chr15      | 22369290  | OR4M2     | M239V     | 62%             | 0%               | sporadic |
| T35    | chr16      | 68344363  | SLC7A6OS  | S116A     | 67%             | 0%               | sporadic |
| T35    | chr17      | 39983820  | NT5C3L    | A209V     | 71%             | 0%               | sporadic |
| T35    | chr19      | 49206985  | FUT2      | G258S     | 57%             | 0%               | sporadic |
| T35    | chr19      | 55358655  | KIR2DS4   | Y237C     | 38%             | 0%               | sporadic |
| T38    | chr1       | 55224131  | PARS2     | N235S     | 67%             | 0%               | sporadic |
| T38    | chr5       | 35641582  | SPEF2     | N71H      | 100%            | 0%               | sporadic |
| T38    | chr7       | 33134883  | RP9       | K210R     | 55%             | 0%               | sporadic |
| T38    | chr9       | 7170006   | KDM4C     | S1037N    | 88%             | 0%               | sporadic |
| T38    | chr12      | 7277236   | RBP5      | M115L     | 67%             | 0%               | sporadic |
| T38    | chr17      | 62492582  | POLG2     | A169T     | 67%             | 0%               | sporadic |
| T38    | chr19      | 15289863  | NOTCH3    | R1231C    | 71%             | 0%               | sporadic |
| T38    | chr19      | 55450746  | NLRP7     | A481T     | 57%             | 0%               | sporadic |
| T38    | chr20      | 61528271  | DIDO1     | A556T     | 67%             | 0%               | sporadic |
| T52    | chr1       | 11775178  | C1orf187  | T284S     | 75%             | 0%               | sporadic |
| T52    | chr1       | 156263940 | C1orf85   | I137V     | 50%             | 0%               | sporadic |
| T52    | chr1       | 158324425 | CD1E      | Q106R     | 63%             | 0%               | sporadic |
| T52    | chr2       | 242757820 | NEU4      | G313R     | 67%             | 0%               | sporadic |
| T52    | chr3       | 50222926  | SEMA3F    | L503M     | 67%             | 0%               | sporadic |
| T52    | chr3       | 195507166 | MUC4      | L3762P    | 55%             | 0%               | sporadic |
| T52    | chr4       | 190989189 | DUX2      | L95M      | 100%            | 0%               | sporadic |
| T52    | chr4       | 190989190 | DUX2      | L95R      | 100%            | 0%               | sporadic |
| T52    | chr5       | 150901601 | FAT2      | R3518H    | 80%             | 0%               | sporadic |
| T52    | chr6       | 100868779 | SIM1      | P352T     | 56%             | 0%               | sporadic |
| T52    | chr13      | 46124056  | FAM194B   | T540A     | 60%             | 0%               | sporadic |
| T52    | chr15      | 59981515  | BNIP2     | V42A      | 67%             | 0%               | sporadic |
| T52    | chr17      | 47039132  | GIP       | S103G     | 50%             | 0%               | sporadic |
| T52    | chr20      | 23017082  | SSTR4     | F321S     | 71%             | 0%               | sporadic |
| T52    | chr22      | 25425282  | KIAA1671  | K439R     | 63%             | 0%               | sporadic |
| T53    | chr1       | 145281543 | NOTCH2NL  | T158I     | 29%             | 0%               | sporadic |
| T53    | chr5       | 108672946 | PJA2      | A705T     | 60%             | 0%               | sporadic |
| T53    | chr5       | 140574103 | PCDHB10   | L660V     | 57%             | 0%               | sporadic |
| T53    | chr5       | 150696496 | SLC36A2   | A445V     | 100%            | 0%               | sporadic |
| T53    | chr7       | 34979905  | DPY19L1   | G502V     | 55%             | 0%               | sporadic |
| T53    | chr8       | 124663987 | KLHL38    | G394R     | 86%             | 0%               | sporadic |
| T53    | chr9       | 33385784  | AQP7      | E202D     | 54%             | 0%               | sporadic |
| T53    | chr9       | 33385786  | AQP7      | E202Q     | 46%             | 0%               | sporadic |
| T53    | chr13      | 109496813 | MYO16     | M385T     | 60%             | 0%               | sporadic |
| T53    | chr19      | 39108034  | MAP4K1    | R70W      | 67%             | 0%               | sporadic |
| T53    | chr19      | 47291174  | SLC1A5    | P17A      | 71%             | 0%               | sporadic |
| T53    | chr19      | 52520607  | ZNF614    | G82R      | 67%             | 0%               | sporadic |
| T53    | chr21      | 47777063  | PCNT      | G704E     | 88%             | 0%               | sporadic |
| T53    | chr22      | 19808769  | GNB1L     | R37H      | 100%            | 0%               | sporadic |



**Supplementary Table 7: Somatic indels in WGS reads of exposed and sporadic PTC cases.**

| <b>Sample</b> | <b>Chromosome</b> | <b>Position</b> | <b>Gene</b> | <b>Effect</b>                     | <b>Tumor frequency</b> | <b>Normal frequency</b> | <b>Group</b> |
|---------------|-------------------|-----------------|-------------|-----------------------------------|------------------------|-------------------------|--------------|
| <b>T8</b>     | chr21             | 34003928        | SYNJ1       | CODON_INSERTION                   | 67%                    | 0%                      | exposed      |
| <b>T27</b>    | chr6              | 170871013       | TBP         | CODON_CHANGE_PLUS_CODON_INSERTION | 63%                    | 0%                      | sporadic     |
| <b>T35</b>    | chr3              | 122459290       | HSPBAP1     | CODON_INSERTION                   | 60%                    | 0%                      | sporadic     |
| <b>T38</b>    | chr6              | 170871013       | TBP         | CODON_CHANGE_PLUS_CODON_INSERTION | 83%                    | 0%                      | sporadic     |
| <b>T38</b>    | chr17             | 4689194         | VMO1        | SPLICE_SITE_DONOR                 | 75%                    | 0%                      | sporadic     |
| <b>T52</b>    | chr17             | 18874685        | FAM83G      | CODON_INSERTION                   | 64%                    | 0%                      | sporadic     |

**Supplementary Table 8: Primers used to validate the novel genetic alterations found in radiation-exposed pediatric thyroid cancer**

| <b>Fusion/Mutation</b>                        |      | <b>Forward (5'&gt;3')</b> | <b>Reverse (5'&gt;3')</b> | <b>Size (bp)</b> |
|-----------------------------------------------|------|---------------------------|---------------------------|------------------|
| <b><i>ETV6-NTRK3</i></b>                      | cDNA | ACACACACAGCCGGAGGTCATAC   | AGTGGGCTGGCTGAGTCCTCC     | 90               |
| <b><i>AGK-BRAF</i></b>                        | cDNA | CTGCTGACCTGGGGAGGCCATT    | TCATCTGCTGGTCGGAAGGGCTG   | 113              |
| <b><i>CREB3L2-PPAR<math>\alpha</math></i></b> | cDNA | CCAGTCGCCCTTCACCCACATT    | TCCACGGAGCTGATCCCAAAGT    | 111              |
| <b>TSHRS425I</b>                              | gDNA | GGGGACAGTGAAGACATGGTGTG   | CAGAGGCGATGAGGAGCAGGT     | 247              |
